# Supplementary material
Source: MDPI journal article supplement (https://www.mdpi.com/2311-7524/7/12/582)

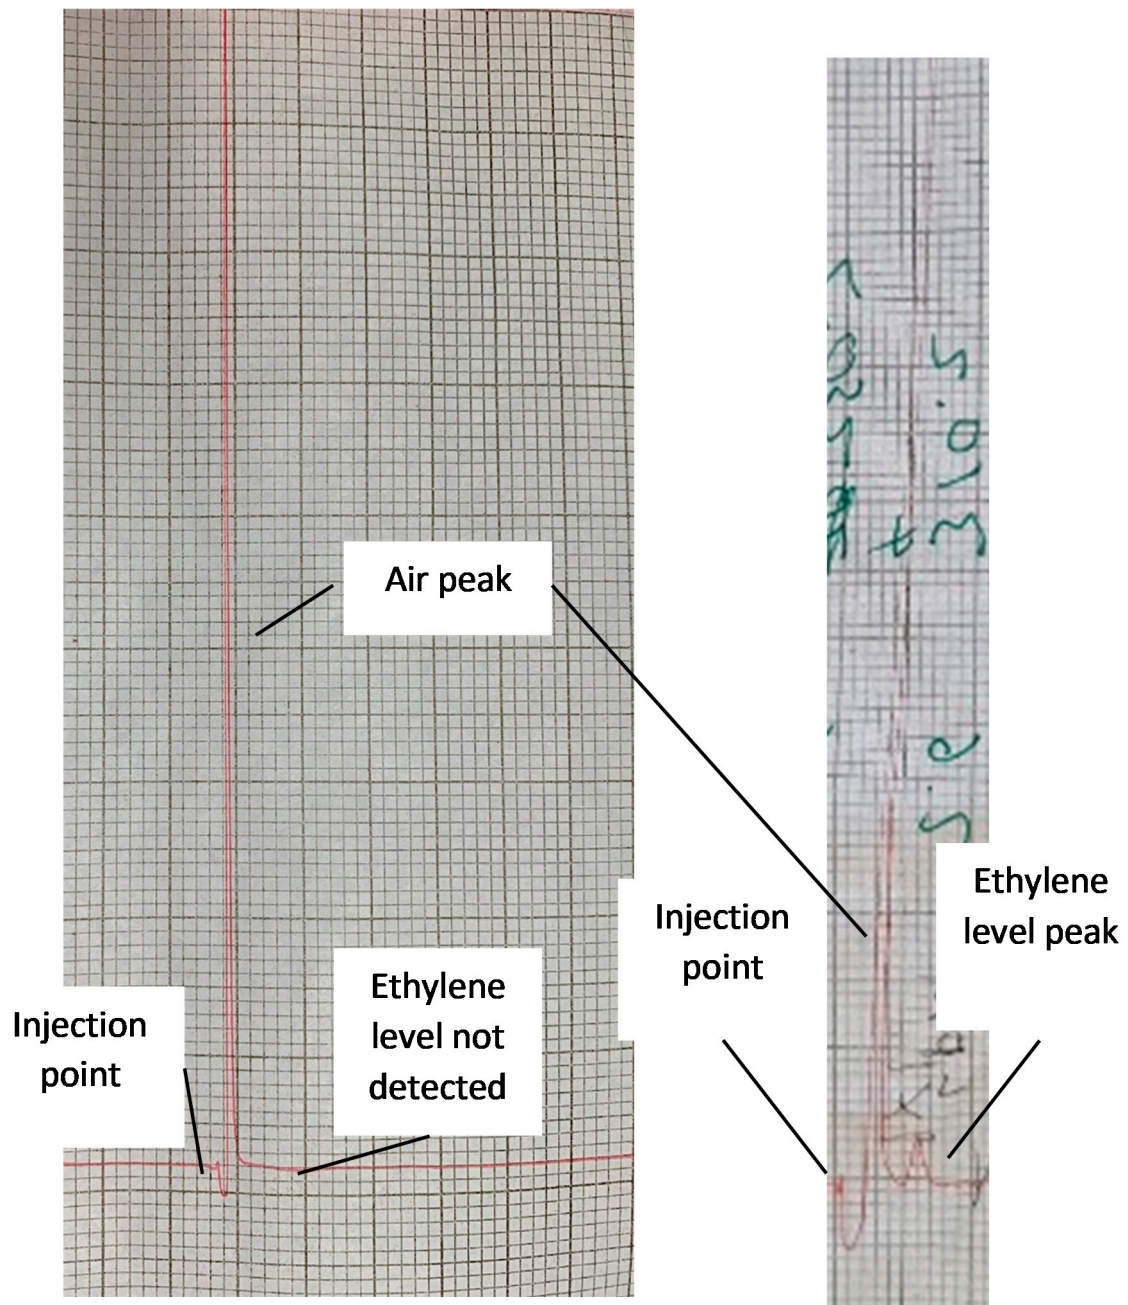

**Figure S1.** Ethylene injection air peak and ethylene level.

Supplement: s1 [file s1]
